# Supplementary material for: Cocaine-regulated microRNA miR-124 controls poly (ADP-ribose) polymerase-1 expression in neuronal cells
Source: PubMed Central journal article supplement (PMC7343862; doi:10.1038/s41598-020-68144-6), 2020-07-08

**Figure 1 F-G  
(Original Blots)**

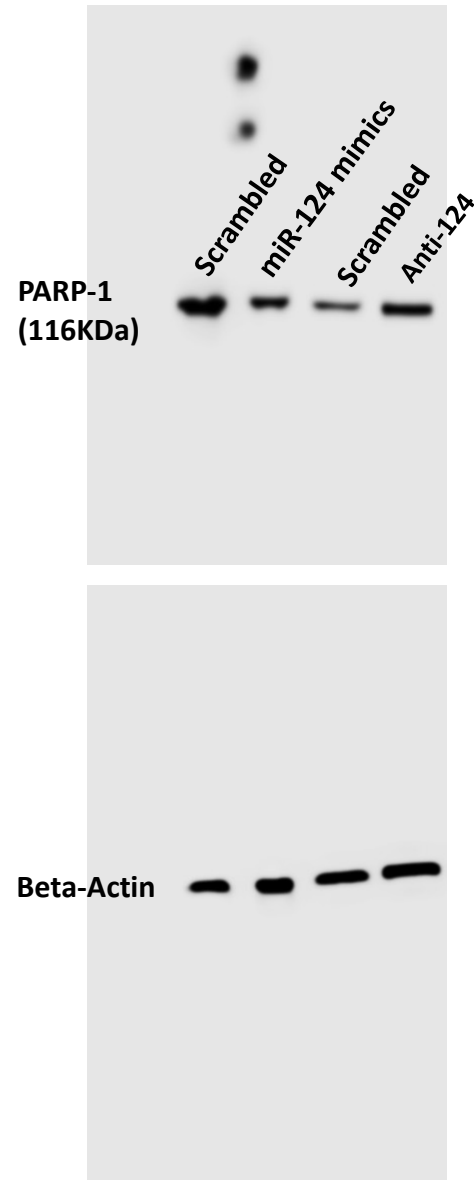

**Figure 4C  
(Original Blots)**

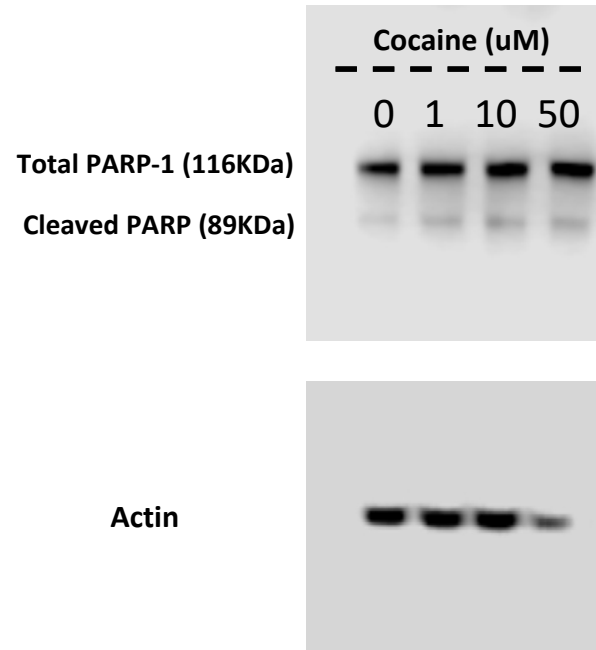

Supplement: 41598_2020_68144_MOESM1_ESM.pdf [file 41598_2020_68144_MOESM1_ESM.pdf]
